# Supplementary material for: Genome-wide screening and characterization of long non-coding RNAs involved in flowering development of trifoliate orange (Poncirus trifoliata L. Raf.)
Source: PubMed Central journal article supplement (PMC5324131; doi:10.1038/srep43226), 2017-02-24
Supplement: srep43226-s1.pdf [file srep43226-s1.pdf]

**Genome-wide screening and characterization of long non-coding RNAs involved in flowering development of trifoliate orange (*Poncirus trifoliata* L. Raf.)**

Chen-Yang Wang<sup>1</sup>, Sheng-Rui Liu<sup>1,2</sup>, Xiao-Yu Zhang<sup>1</sup>, Yu-Jiao Ma<sup>1</sup>, Chun-Gen Hu<sup>1,\*</sup>, Jin-Zhi Zhang<sup>1,\*</sup>

<sup>1</sup>Key Laboratory of Horticultural Plant Biology (Ministry of Education), College of Horticulture and Forestry Science, Huazhong Agricultural University, Wuhan 430070, China

<sup>2</sup>Present address: State Key Laboratory of Tea Plant Biology and Utilization, Anhui Agricultural University, Hefei 230036, China

<sup>1</sup>These authors contributed equally to this work.

\*Corresponding author

E-mail: jinzhizhang@mail.hzau.edu.cn or chungeng@mail.hzau.edu.cn

Tel: +86-27-8728-1826

Fax: +86-27-8728-2010

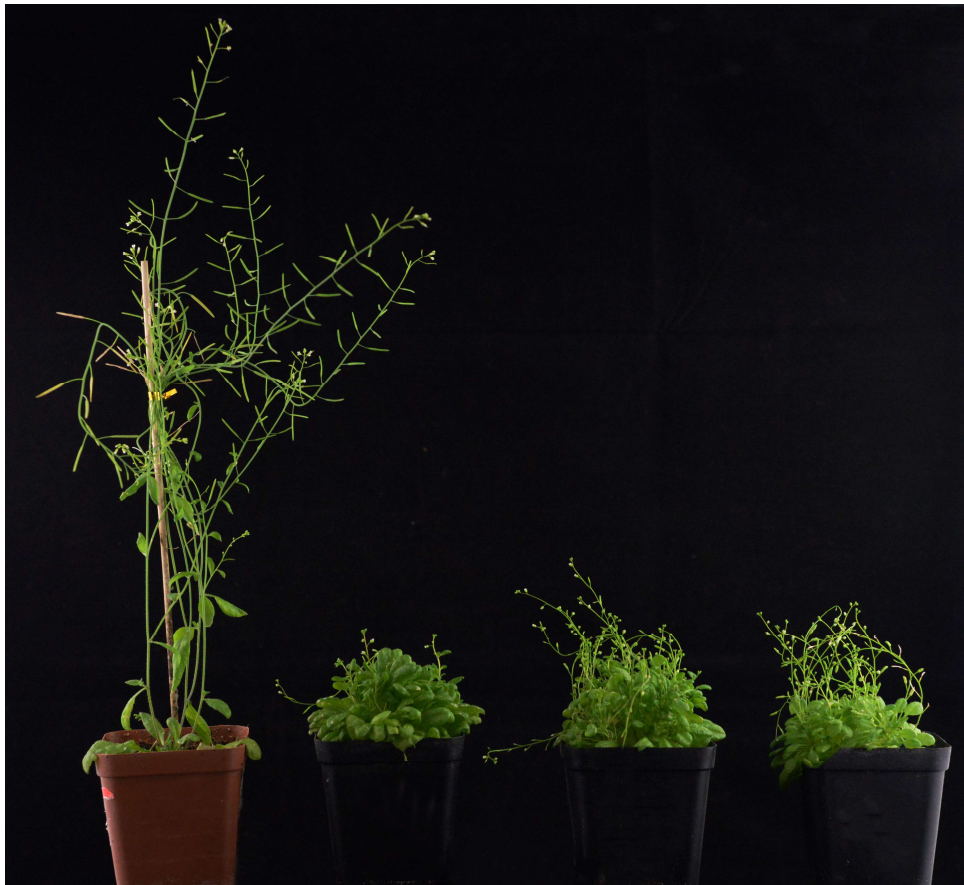

Figure S1. Senescent phenotypes of control and three transgenic lines of p35S:Pt-miR156a2.
